# Supplementary material for: Graphing and reporting heterogeneous treatment effects through reference classes
Source: Springer Nature journal article supplement (doi:10.1186/s13063-020-04306-1), 2020-05-07

## Supplementary figures

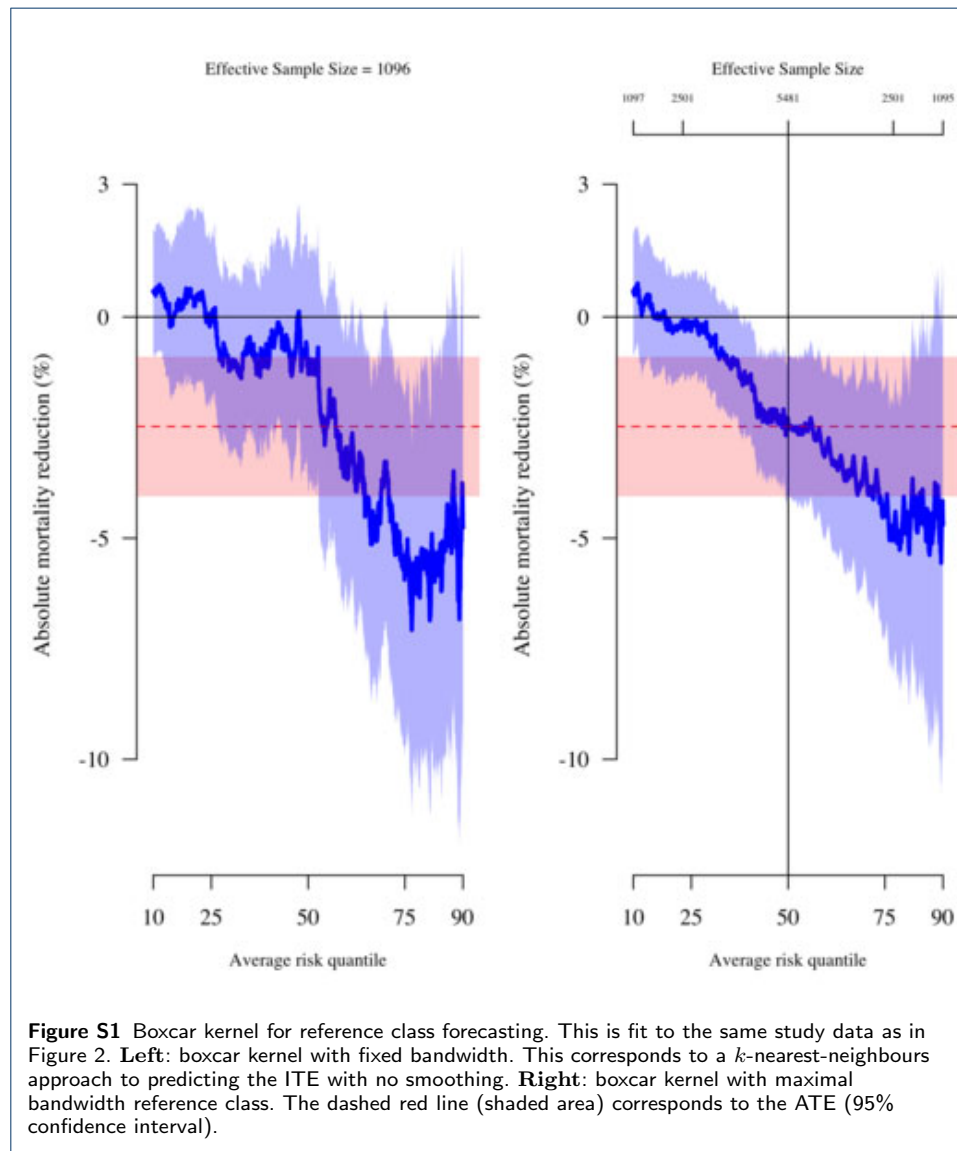

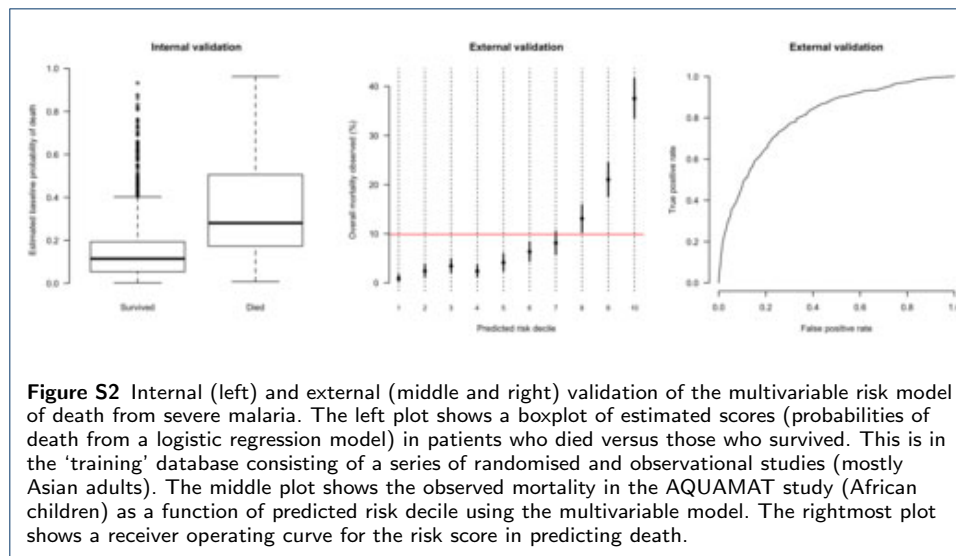

Supplement: MOESM1 [file 17962748]
